# Supplementary material for: Low Red to Far-Red Light Ratio Promoted Growth and Fruit Quality in Salt-Stressed Tomato Plants Based on Metabolomic Analysis
Source: MDPI journal article supplement (doi:10.3390/agronomy14050983), 2024-05-08
Supplement: s1 [file s1]

Table S1 Effects of R:FR on differential metabolites in tomato plant under salt stress

| Number | Metabolite name                 | Compound classification | P-value |
|--------|---------------------------------|-------------------------|---------|
| 1      | Galacturonic acid               | carbohydrates           | 0.018   |
| 2      | Alpha-d-glucose                 |                         | 0.007   |
| 3      | Cellobiose                      |                         | 0.033   |
| 4      | Glucosamine                     |                         | 0.016   |
| 5      | Trehalose-6-phosphate           |                         | 0.032   |
| 6      | Mannitol                        |                         | 0.001   |
| 7      | D-fucose                        |                         | 0.015   |
| 8      | Sorbitol                        |                         | 0.033   |
| 9      | Palatinitol                     |                         | 0.028   |
| 10     | Methyl alpha-d-fructofuranoside |                         | 0.038   |
| 11     | Isocitric acid                  | Organic acids           | 0       |
| 12     | Alpha-ketoglutarate             |                         | 0       |
| 13     | Fumaric acid                    |                         | 0.012   |
| 14     | 3-hydroxybutyric acid           |                         | 0       |
| 15     | Glucaric acid gama-lactone      |                         | 0.036   |
| 16     | 2-oxo-propanoic acid            |                         | 0.003   |
| 17     | Orotic acid                     |                         | 0.032   |
| 18     | Citraconic acid                 |                         | 0.003   |
| 19     | Itaconic acid                   |                         | 0.003   |
| 20     | Erucic acid                     |                         | 0       |
| 21     | 4-hydroxymandelic acid          | Phenolics               | 0.004   |
| 22     | 1,2,4-benzenetriol              |                         | 0       |
| 23     | Biphenyl                        |                         | 0       |
| 24     | Beta-tocopherol                 |                         | 0.019   |
| 25     | O-phosphoserine                 | Amino acids             | 0       |
| 26     | Tyramine                        |                         | 0.001   |
| 27     | Serotonin                       |                         | 0       |
| 28     | Adenosine-5'-monophosphate      | Nucleosides             | 0.019   |
| 29     | 1-methyladenosine               |                         | 0.022   |
| 30     | Udp-glucuronic acid             |                         | 0       |
| 31     | 5-methyluridine                 |                         | 0.03    |
| 32     | Cytidine-5-monophosphate        |                         | 0.046   |

|    |                  |                    |       |
|----|------------------|--------------------|-------|
| 33 | 4-pentenoic acid |                    | 0.007 |
| 34 | Maltitol         | Lipids             | 0.032 |
| 35 | Dodecanol        |                    | 0     |
| 36 | Uracil           |                    | 0     |
| 37 | Thymine          |                    | 0     |
| 38 | Xanthine         |                    | 0.001 |
| 39 | Xylonolactone    | Organoheterocyclic | 0     |
| 40 | Alloxanoic acid  |                    | 0.005 |
| 41 | Maleimide        |                    | 0     |
| 42 | Propane-1,3-diol |                    | 0     |

Table S2 The number of differentially expressed metabolites (DEMs) from tomato fruits exposed to different R/FR and salt stress

| Group<br>dass | regulation     | Carbohy-<br>drates | Organic<br>acids | Amino<br>acids | Phenols | Nucleo-<br>tides | Lipids | Organic-<br>heterocyclic | Total |
|---------------|----------------|--------------------|------------------|----------------|---------|------------------|--------|--------------------------|-------|
| L/CK          | Up-regulated   | 3                  | 5                | 10             | 4       | 2                | 4      | 8                        | 36    |
|               | Down-regulated | 2                  | 1                | 0              | 0       | 2                | 1      | 0                        | 6     |
| Na/CK         | Up-regulated   | 3                  | 5                | 1              | 3       | 1                | 4      | 8                        | 25    |
|               | Down-regulated | 0                  | 1                | 2              | 0       | 1                | 2      | 1                        | 7     |
| Na+L          | Up-regulated   | 4                  | 5                | 0              | 3       | 1                | 3      | 3                        | 19    |
| /Na           | Down-regulated | 2                  | 1                | 0              | 0       | 3                | 0      | 0                        | 6     |

Table S3 Effect of R:FR on metabolic pathway in tomato fruit under salt stress

| KEGG ID  | Metabolic pathway name                      | Rich-factor | P-value |
|----------|---------------------------------------------|-------------|---------|
| sly00020 | Citrate cycle (TCA cycle)                   | 0.150       | 0.000   |
| sly00660 | C5-Branched dibasic acid metaboLism         | 0.088       | 0.001   |
| sly00650 | Butanoate metabolism                        | 0.071       | 0.002   |
| sly00051 | Fructose and mannose metabolism             | 0.056       | 0.004   |
| sly00040 | Pentose and glucuronate interconversions    | 0.054       | 0.005   |
| sly00240 | Pyrimidine metabolism                       | 0.046       | 0.007   |
| sly00220 | Arginine biosynthesis                       | 0.087       | 0.009   |
| sly00250 | Alanine, aspartate and glutamate metabolism | 0.071       | 0.013   |
| sly00520 | Amino sugar and nucleotide sugar metabolism | 0.020       | 0.028   |
| sly00052 | Galactose metabolism                        | 0.043       | 0.032   |
| sly00053 | Ascorbate and aldarate metabolism           | 0.041       | 0.036   |
| sly00072 | Synthesis and degradation of ketone bodies  | 0.167       | 0.037   |
| sly00630 | Glyoxylate and dicarboxylate metabolism     | 0.032       | 0.056   |
| sly00350 | Tyrosine metabolism                         | 0.026       | 0.084   |
| sly00190 | Oxidative phosphorylation                   | 0.063       | 0.095   |
| sly00230 | Purine metabolism                           | 0.021       | 0.117   |
| sly00430 | Taurine and hypotaurine metabolism          | 0.045       | 0.129   |
| sly00232 | Caffeine metabolism                         | 0.045       | 0.129   |
| sly00290 | Valine, leucine and isoleucine biosynthesis | 0.043       | 0.134   |
| sly00770 | Pantothenate and CoA biosynthesis           | 0.033       | 0.171   |
| sly00620 | Pyruvate metabolism                         | 0.032       | 0.177   |
| sly00010 | Glycolysis / Gluconeogenesis                | 0.032       | 0.177   |
| sly00410 | beta-Alanine metabolism                     | 0.031       | 0.182   |
| sly00300 | Lysine biosynthesis                         | 0.029       | 0.197   |
| sly00500 | Starch and sucrose metabolism               | 0.027       | 0.207   |
| sly00908 | Zeatin biosynthesis                         | 0.026       | 0.217   |
| sly00340 | Histidine metabolism                        | 0.021       | 0.256   |
| sly00310 | Lysine degradation                          | 0.020       | 0.270   |
| sly00260 | Glycine, serine and threonine metabolism    | 0.020       | 0.270   |
| sly00970 | Aminoacyl-tRNA biosynthesis                 | 0.019       | 0.279   |
| sly00760 | Nicotinate and nicotinamide metabolism      | 0.018       | 0.292   |

|          |                                                     |        |        |
|----------|-----------------------------------------------------|--------|--------|
| sly00360 | Phenylalanine metabolism                            | 0. 017 | 0. 314 |
| sly00270 | Cysteine and methionine metabolism                  | 0. 016 | 0. 327 |
| sly01040 | Biosynthesis of unsaturated fatty acids             | 0. 014 | 0. 352 |
| sly00130 | Ubiquinone and other terpenoid-quinone biosynthesis | 0. 014 | 0. 361 |
| sly00380 | Tryptophan metabolism                               | 0. 012 | 0. 408 |
| sly02010 | ABC transporters                                    | 0. 011 | 0. 444 |
| sly00950 | Isoquinoline alkaloid biosynthesis                  | 0. 008 | 0. 539 |
